# Supplementary material
Source: MDPI journal article supplement (https://www.mdpi.com/2071-1050/16/7/3075)
Supplement: s1 [file s1]

# Drivers of Macroinvertebrate Communities in Mediterranean Rivers: a Mesohabitat Approach

Juan Diego Alcaraz-Hernández <sup>1,2</sup>, Javier Sánchez-Hernández <sup>3</sup>, Rafael Muñoz-Mas <sup>1,2,4</sup> and Francisco Martínez-Capel <sup>4</sup>

1. GRECO, Institute of Aquatic Ecology, University of Girona, 17003 Girona, Catalonia (Spain).
2. TRAGSATEC Group, C/Julían Camarillo, 6B, 28037 Madrid (Spain).
3. Área de Biodiversidad y Conservación, Departamento de Biología y Geología, Física y Química Inorgánica, Universidad Rey Juan Carlos, Móstoles, Madrid (Spain).
4. Institut d'Investigació per a la Gestió Integrada de Zones Costaneres (IGIC), Universitat Politècnica de València, 46730 Grao de Gandia (Spain)

## Supplementary Materials

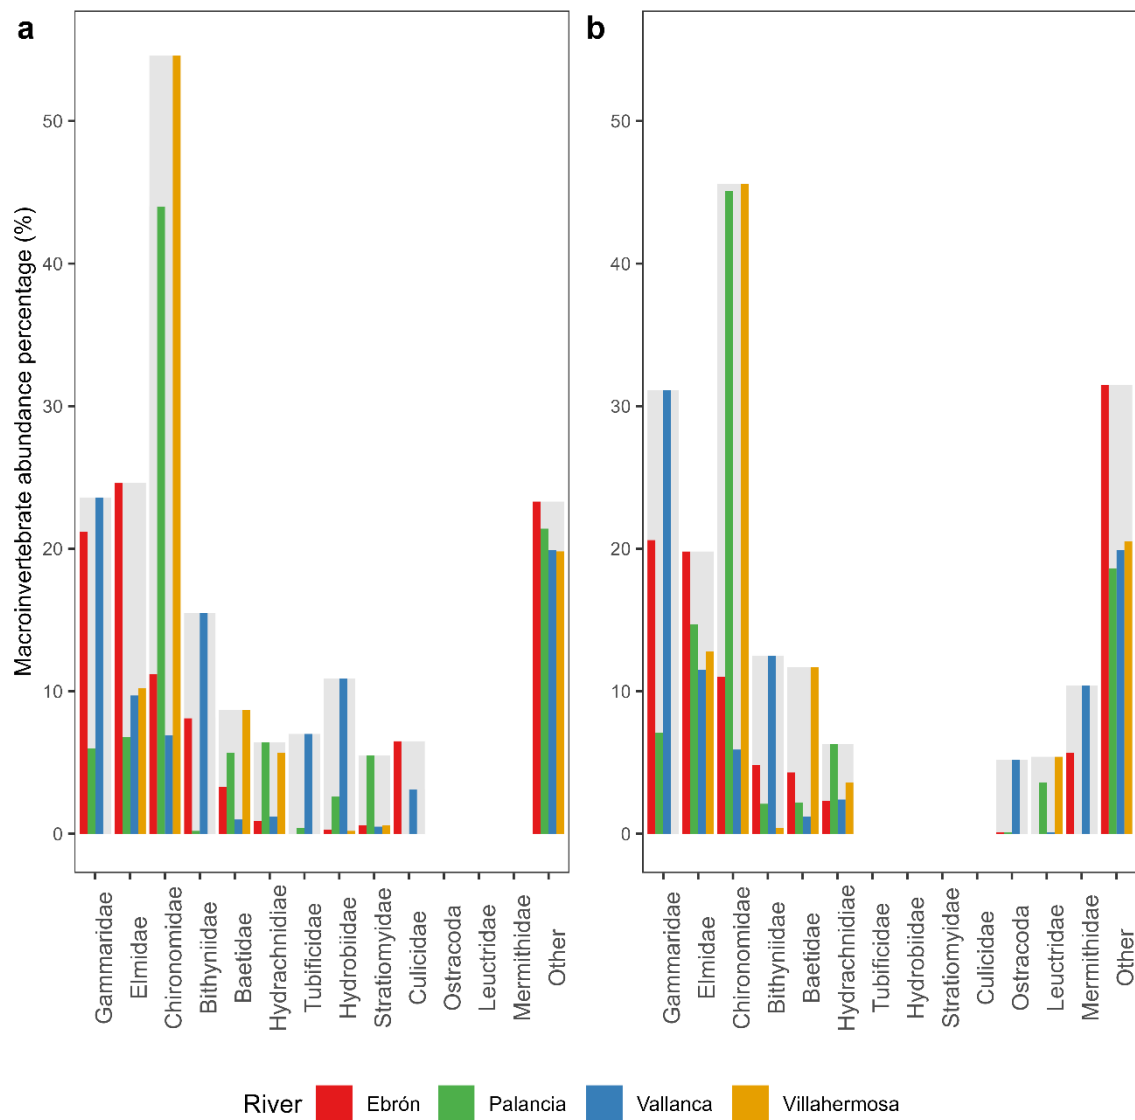

**Figure S1.** Relative abundance of macroinvertebrates (%) aggregated by families (excluding the order Ostracoda) and river. Data are categorized on habitat types, delineated as (a) slow and (b) fast hydromorphological units (HMUs). Other families comprise taxa present in less than 5 % of the samples in any of the four rivers.

**Table S1.** Relative abundance of macroinvertebrates (%) pooled by river. Data are displayed by habitat type (slow and fast hydromorphological units or HMUs).

| Taxa            | Slow HMUs |          |          |              | Fast HMUs |          |          |              |
|-----------------|-----------|----------|----------|--------------|-----------|----------|----------|--------------|
|                 | Ebrón     | Palancia | Vallanca | Villahermosa | Ebrón     | Palancia | Vallanca | Villahermosa |
| Dugesidae       | 0.8       | 1.8      | 0.3      | 0.4          | 1.1       | 0.9      | 0.1      | 1.3          |
| Planariidae     | 0.2       | –        | 0.2      | –            | –         | 0.7      | 0.1      | 0.1          |
| Dendrocoelidae  | 0.2       | –        | –        | –            | –         | –        | –        | –            |
| Tubificidae     | –         | 0.4      | 7.0      | –            | –         | –        | 1.8      | –            |
| Naididae        | 0.3       | –        | –        | –            | 1.1       | –        | 0.2      | –            |
| Haplotaxidae    | –         | –        | 0.2      | –            | 0.1       | –        | 0.4      | 0.4          |
| Lumbriculidae   | 0.1       | –        | 0.3      | –            | 0.5       | –        | 1.4      | –            |
| Lumbricidae     | 2.2       | 0.5      | 2.5      | –            | 2.1       | 0.3      | 1.2      | –            |
| Hirudinidae     | 0.1       | –        | –        | –            | 0.1       | –        | –        | –            |
| Erpobdellidae   | –         | –        | 0.1      | –            | –         | –        | 0.4      | –            |
| Glossiphoniidae | 0.4       | –        | 0.1      | –            | 0.1       | –        | –        | –            |
| Bithyniidae     | 8.1       | 0.2      | 15.5     | –            | 4.8       | 2.1      | 12.5     | 0.4          |
| Ancylidae       | 0.2       | –        | 0.5      | –            | 0.4       | –        | 2.1      | –            |
| Planorbidae     | 0.1       | –        | 0.1      | –            | –         | –        | 0.2      | –            |
| Lymnaeidae      | –         | 0.9      | 1.1      | –            | –         | 0.4      | 0.2      | 0.4          |
| Hydrobiidae     | 0.3       | 2.6      | 10.9     | 0.2          | 0.6       | 1.6      | 0.9      | 0.4          |
| Pisidiidae      | 0.1       | –        | 0.3      | –            | –         | –        | 0.2      | –            |
| Sphaeriidae     | 0.1       | 0.1      | 0.2      | –            | 0.1       | –        | 0.1      | –            |
| Gammaridae      | 21.2      | 6.0      | 23.6     | –            | 20.6      | 7.1      | 31.1     | –            |
| Asellidae       | –         | –        | –        | –            | –         | –        | –        | –            |
| Ostracoda       | –         | 0.4      | 0.5      | –            | 0.1       | 0.1      | 5.2      | –            |
| Gerridae        | –         | 0.1      | –        | 0.2          | –         | 0.1      | 0.1      | –            |
| Corixidae       | –         | –        | 0.3      | –            | –         | –        | –        | –            |
| Aphelocheiridae | –         | –        | –        | –            | –         | –        | –        | –            |
| Hydrometridae   | –         | –        | –        | –            | –         | –        | –        | –            |
| Nepidae         | –         | –        | –        | –            | –         | –        | –        | –            |
| Mesovellidae    | –         | 0.2      | –        | –            | –         | –        | –        | –            |
| Elmidae         | 24.6      | 6.8      | 9.7      | 10.2         | 19.8      | 14.7     | 11.5     | 12.8         |
| Gyrinidae       | –         | –        | 0.5      | –            | –         | –        | –        | 0.1          |
| Dytiscidae      | –         | 0.1      | 0.1      | –            | –         | –        | 0.1      | 0.1          |
| Scirtidae       | 0.3       | –        | 1.4      | –            | 0.1       | 0.1      | 1.2      | –            |
| Hydraenidae     | –         | –        | –        | –            | –         | –        | –        | –            |
| Hydrophilidae   | –         | –        | –        | –            | –         | –        | –        | –            |
| Halplidae       | –         | 0.2      | –        | 0.5          | –         | –        | –        | –            |
| Helodidae       | –         | 0.3      | –        | 0.1          | –         | –        | –        | 0.2          |
| Dryopidae       | –         | 0.3      | –        | –            | –         | –        | –        | –            |
| Empididae       | 1.5       | 0.7      | 0.2      | 0.4          | 0.7       | 1.0      | 0.3      | 0.8          |
| Tabanidae       | 0.1       | –        | 0.6      | –            | 0.2       | –        | 0.1      | –            |
| Stratiomyidae   | 0.6       | 5.5      | 0.5      | 0.6          | 2.9       | 4.2      | 0.9      | 1.0          |
| Athericidae     | 0.6       | 0.2      | 1.7      | –            | 0.4       | 0.2      | –        | –            |
| Anthonomyidae   | –         | –        | –        | 0.2          | –         | –        | –        | 0.1          |
| Ceratopogonidae | –         | 0.1      | 0.2      | 1.1          | 0.1       | 0.2      | 0.1      | 0.4          |
| Chironomidae    | 11.2      | 44.0     | 6.9      | 54.6         | 11.0      | 45.1     | 5.9      | 45.6         |

(Continuation)

**Table S1.** Relative abundance of macroinvertebrates (%) pooled by river. Data are displayed by habitat type (slow and fast hydromorphological units or HMUs). (Continuation)

| Taxa              | Slow HMUs |          |          |              | Fast HMUs |          |          |              |
|-------------------|-----------|----------|----------|--------------|-----------|----------|----------|--------------|
|                   | Ebrón     | Palancia | Vallanca | Villahermosa | Ebrón     | Palancia | Vallanca | Villahermosa |
| Culicidae         | 6.5       | –        | 3.1      | –            | 4.4       | –        | 1.0      | –            |
| Simuliidae        | 0.6       | 0.2      | –        | 0.5          | 0.3       | 0.6      | 0.2      | 3.2          |
| Tipulidae         | 0.1       | –        | –        | 0.1          | –         | –        | –        | –            |
| Limoniidae        | 0.2       | 0.9      | 0.1      | 0.9          | –         | 0.3      | 0.3      | 0.8          |
| Psychodidae       | 1.2       | 0.2      | 0.1      | –            | 2.0       | 0.3      | –        | –            |
| Dixidae           | –         | 0.1      | –        | –            | –         | –        | –        | 0.1          |
| Ephydriidae       | –         | –        | –        | –            | –         | –        | –        | –            |
| Hydroptilidae     | 0.1       | 1.3      | 1.6      | 1.4          | 0.2       | 1.1      | 0.1      | 1.1          |
| Polycentropodidae | 0.4       | 0.8      | –        | 1.6          | 0.1       | 0.6      | 0.1      | 0.3          |
| Philopotamidae    | 0.9       | 0.3      | –        | 0.1          | 0.3       | –        | 0.4      | 0.2          |
| Odontoceridae     | 0.2       | 0.2      | –        | –            | –         | –        | 0.1      | 0.4          |
| Rhyacophilidae    | 0.7       | 0.2      | 0.3      | 0.2          | 0.6       | 0.1      | –        | –            |
| Glossosomatidae   | 0.5       | 0.2      | 2.2      | 0.1          | 0.9       | 0.2      | 1.4      | 0.1          |
| Hydropsychidae    | 0.9       | 1.4      | 0.1      | 0.8          | 3.2       | 1.5      | 0.7      | 0.8          |
| Sericostomatidae  | 0.6       | –        | 0.1      | –            | 1.0       | –        | –        | –            |
| Psychomyiidae     | –         | 0.1      | 0.1      | 0.1          | 0.1       | 0.1      | 0.3      | 0.2          |
| Ecnomidae         | 0.1       | –        | –        | 2.1          | –         | –        | –        | 0.5          |
| Beraeidae         | 0.2       | –        | –        | –            | –         | –        | –        | –            |
| Calamoceratidae   | 0.1       | –        | –        | –            | 0.1       | –        | –        | –            |
| Brachycentridae   | –         | –        | –        | 0.6          | –         | –        | –        | –            |
| Leptoceridae      | –         | 0.1      | –        | 0.2          | –         | –        | 0.1      | 0.1          |
| Lepidostomatidae  | –         | –        | –        | 0.1          | –         | –        | –        | –            |
| Leuctridae        | 0.1       | 2.4      | 0.1      | 2.2          | –         | 3.6      | 0.1      | 5.4          |
| Nemouridae        | –         | 0.1      | –        | –            | –         | –        | 0.3      | 2.1          |
| Perlidae          | 0.1       | –        | –        | 0.1          | –         | –        | –        | –            |
| Perlodidae        | –         | 0.2      | –        | –            | –         | –        | –        | –            |
| Ephemerellidae    | 1.2       | 3.2      | 0.1      | 0.1          | 2.3       | 2.9      | 0.7      | 0.4          |
| Heptageniidae     | 1.4       | –        | 0.6      | 0.3          | 2.0       | –        | 0.3      | 0.2          |
| Oligoneuriidae    | 0.7       | –        | –        | –            | 0.1       | –        | 0.2      | –            |
| Ephemeridae       | 0.2       | 0.1      | –        | –            | –         | –        | –        | –            |
| Baetidae          | 3.3       | 5.7      | 1.0      | 8.7          | 4.3       | 2.2      | 1.2      | 11.7         |
| Caenidae          | 2.9       | 1.1      | 0.9      | 3.0          | 3.1       | 0.5      | 0.7      | 1.3          |
| Leptophlebiidae   | 0.1       | 0.9      | –        | 0.3          | 0.1       | 0.3      | –        | –            |
| Pothamanthidae    | –         | –        | 0.3      | 0.4          | –         | –        | –        | –            |
| Prosopistomatidae | 0.1       | –        | –        | –            | –         | –        | –        | –            |
| Libellulidae      | –         | –        | –        | 0.6          | –         | –        | –        | –            |
| Calopterygidae    | –         | 0.7      | 0.1      | 0.1          | –         | 0.1      | 0.1      | –            |
| Cordulegasteridae | 0.1       | 0.6      | 0.3      | –            | –         | –        | 0.2      | –            |
| Gomphidae         | –         | 0.9      | 0.2      | 1.3          | 0.1       | 0.2      | 0.6      | 3.4          |
| Aeshnidae         | –         | 0.1      | –        | –            | –         | 0.1      | –        | –            |
| Coenagrionidae    | –         | 0.1      | 0.1      | –            | –         | –        | –        | –            |
| Mermithidae       | 2.3       | –        | 1.4      | –            | 5.7       | –        | 10.4     | –            |
| Hydrachnidae      | 0.9       | 6.4      | 1.2      | 5.7          | 2.3       | 6.3      | 2.4      | 3.6          |

**Table S2.** Pearson correlation coefficients between biological parameters (abundance, richness and diversity indices) and environmental attributes in (a) slow and (b) fast hydromorphological units (HMUs). HMU width (Wid), mean depth (Dmed), maximum depth (Dmax), substrate coarse (Scoarse), substrate medium (Smed), substrate fine (Sfine), aquatic vegetation (Veg), density of woody debris (WD), embeddedness (Emb), shade (Sha). No significant outcomes were found for Wid and Sfine. Only significant relationships are shown ( $p < 0.05$ ).

|               |           | Dmed     | Dmax   | Scoarse | Smed | Veg      | WD       | Emb | Sha |
|---------------|-----------|----------|--------|---------|------|----------|----------|-----|-----|
| (a) Slow HMUs |           |          |        |         |      |          |          |     |     |
| Ebrón         | Abundance | -        | -      | -       | -    | -        | -        | -   | -   |
|               | Richness  |          |        |         |      |          |          |     |     |
|               | Shannon   | 0.744*** | -      | -       | -    | -0.712** | -        | -   | -   |
|               | Simpson   | 0.754*** | 0.652* | -       | -    | -0.607*  | -0.725** | -   | -   |
| Vallanca      | Abundance | -        | -      | -       | -    | 0.792*** | -        | -   | -   |
|               | Richness  | -        | -      | -       | -    | -        | -        | -   | -   |
|               | Shannon   | 0.617*   | -      | -0.641* | -    | -        | -        | -   | -   |
|               | Simpson   | -        | -      | -0.640* | -    | -        | -        | -   | -   |
| Palancia      | Abundance | -        | -      | -       | -    | -        | -        | -   | -   |
|               | Richness  | -        | -      | -       | -    | -        | -        | -   | -   |
|               | Shannon   | -        | -      | -       | -    | -0.678*  | -        | -   | -   |
|               | Simpson   | -        | -      | -       | -    | -0.700*  | -        | -   | -   |
| Villahermosa  | Abundance | -        | -      | -       | -    | -        | -        | -   | -   |
|               | Richness  | -        | -      | -       | -    | -        | -        | -   | -   |
|               | Shannon   | 0.742*   | -      | -       | -    | -        | -        | -   | -   |
|               | Simpson   | 0.806*   | -      | -       | -    | -        | -        | -   | -   |

\* $p < 0.05$ ; \*\* $p < 0.01$ ; \*\*\* $p < 0.005$ .

(Continuation)

**Table S2.** Pearson correlation coefficients between biological parameters (abundance, richness and diversity indices) and environmental attributes in (a) slow and (b) fast hydromorphological units (HMUs). HMU width (Wid), mean depth (Dmed), maximum depth (Dmax), substrate coarse (Scoarse), substrate medium (Smed), substrate fine (Sfine), aquatic vegetation (Veg), density of woody debris (WD), embeddedness (Emb), shade (Sha). No significant outcomes were found for Wid and Sfine. Only significant relationships are shown ( $p < 0.05$ ). (Continuation)

|               |           | Dmed | Dmax    | Scoarse | Smed    | Veg | WD | Emb      | Sha    |
|---------------|-----------|------|---------|---------|---------|-----|----|----------|--------|
| (b) Fast HMUs |           |      |         |         |         |     |    |          |        |
| Ebrón         | Abundance | -    | -       | -       | -       | -   | -  | -        | -      |
|               | Richness  | -    | -       | -       | -       | -   | -  | -        | -      |
|               | Shannon   | -    | -0.692* | -       | -0.614* | -   | -  | -        | 0.658* |
|               | Simpson   | -    | -       | -       | -       | -   | -  | -        | 0.693* |
| Vallanca      | Abundance | -    | -       | -       | -       | -   | -  | -        | -      |
|               | Richness  | -    | -       | -       | -       | -   | -  | -        | -      |
|               | Shannon   | -    | -       | -       | -       | -   | -  | -        | -      |
|               | Simpson   | -    | -       | -       | -       | -   | -  | -        | -      |
| Palancia      | Abundance | -    | -       | -       | -       | -   | -  | -        | -      |
|               | Richness  | -    | -       | -       | -       | -   | -  | -        | 0.716* |
|               | Shannon   | -    | -       | -       | -       | -   | -  | -        | -      |
|               | Simpson   | -    | -       | -       | -       | -   | -  | -        | -      |
| Villahermosa  | Abundance | -    | -       | -       | -       | -   | -  | -        | -      |
|               | Richness  | -    | -       | -       | -       | -   | -  | 0.765*   | -      |
|               | Shannon   | -    | -0.779* | -       | -       | -   | -  | 0.872*** | -      |
|               | Simpson   | -    | -       | -       | -       | -   | -  | -        | -      |

\* $p < 0.05$ ; \*\* $p < 0.01$ ; \*\*\* $p < 0.005$ .
